# Supplementary material
Source: ML conference proceedings conference paper supplement (https://openaccess.thecvf.com/content/ICCV2025/html/Wang_Deterministic_Object_Pose_ICCV_2025_paper.html)
Supplement: Supplementary file 1 [file Wang_Deterministic_Object_Pose_ICCV_2025_supplemental.pdf]

## 6. Supplementary Experiments

### 6.1. Keypoint Confidence Regions

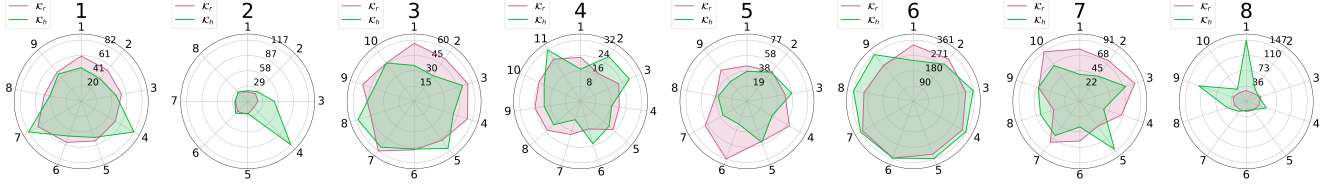

Figure 6. Radar charts illustrating the mean radii of keypoint confidence regions ( $\mathcal{K}^h$  and  $\mathcal{K}^r$ ). The eight radar charts correspond to the eight objects in the LMO dataset (from left to right). Each axis in a given radar chart represents one of the specific object’s keypoints.

| LMO [23]<br>Objects | Ours         | [9]              |                  | [11]        |
|---------------------|--------------|------------------|------------------|-------------|
|                     |              | $\epsilon = 0.1$ | $\epsilon = 0.4$ |             |
| ape (1)             | 76.78        | 77.70            | <b>79.52</b>     | 69.14       |
| can (2)             | <b>91.96</b> | 73.41            | 75.97            | 86.09       |
| cat (3)             | 90.11        | 87.36            | <b>90.59</b>     | 65.12       |
| driller (4)         | <b>89.29</b> | 79.32            | 83.08            | 61.44       |
| duck (5)            | <b>84.39</b> | 82.71            | 82.54            | 73.06       |
| eggbox (6)          | 6.85         | 0                | 0                | <b>8.43</b> |
| glue (7)            | 69.83        | 56.49            | <b>71.08</b>     | 55.37       |
| holepuncher (8)     | <b>86.44</b> | 81.65            | 82.89            | 69.84       |
| mean                | <b>74.45</b> | 67.33            | 70.71            | 61.06       |
| SPEED [22]          | <b>97.09</b> | 57.80            | 57.40            | 57.46       |

Table 5. Acc of baseline methods and our approach

| LMO [23]<br>Objects | Ours $\mathcal{K}^r$ |                  | [9] $\mathcal{K}^h$ |                  |
|---------------------|----------------------|------------------|---------------------|------------------|
|                     | $\epsilon = 0.1$     | $\epsilon = 0.4$ | $\epsilon = 0.1$    | $\epsilon = 0.4$ |
| 1                   | <b>90.37</b>         | 61.51            | 88.35               | 64.87            |
| 2                   | 89.97                | 59.90            | <b>93.54</b>        | 61.81            |
| 3                   | 91.63                | 64.63            | <b>92.30</b>        | 63.69            |
| 4                   | <b>91.84</b>         | 59.30            | 90.86               | 64.74            |
| 5                   | <b>90.31</b>         | 64.09            | 90.13               | 64.94            |
| 6                   | 88.40                | 59.90            | <b>88.86</b>        | 60.37            |
| 7                   | <b>92.02</b>         | 54.34            | 91.97               | 59.83            |
| 8                   | 90.66                | 59.42            | <b>93.31</b>        | 66.86            |
| mean                | 90.65                | 60.38            | <b>91.16</b>        | 63.38            |
| SPEED [22]          | <b>89.66</b>         | 61.25            | 88.88               | 62.64            |

Table 6.  $\eta^{kpt}$  of baseline methods and our approach

### 6.2. Qualitative Pose Confidence Regions

Fig. 7 and Fig. 8 provides SPEED satellites’  $\mathcal{K}^r$ ,  $\mathcal{R}_r^d$ , and  $\mathcal{T}_r^d$  with  $\epsilon = 0.1$  and  $\epsilon = 0.4$  across varying viewpoints and diverse backgrounds.

Fig. 9 and Fig. 10 provides 8 LMO objects’  $\mathcal{P}_{\Theta}(\mathbf{x}_n|\mathbf{I})$ ,  $\mathcal{K}^r$ ,  $\mathcal{R}_r^d$ , and  $\mathcal{T}_r^d$  with  $\epsilon = 0.1$  and  $\epsilon = 0.4$ .

### 6.3. Single-shot PnP

Unlike sampling methods, in this paper we follows [45] utilizing the single-shot PnP weighted by  $\sigma_n$ , thereby significantly enhancing the algorithm’s efficiency. To incorporate the uncertainty into our single-shot PnP framework, we assign weights to  $\tilde{\mathbf{x}}_n$  based on  $\sigma^n$ . The optimization problem for pose estimation can be expressed as follows:

$$\min_{\mathbf{R}, \mathbf{t}} \sum_{n=1}^N \rho \left( \mathbf{r}(n)^\top (\boldsymbol{\sigma}^n)^{-1} \mathbf{r}(n) \right), \quad (19)$$

where  $\mathbf{r}(i)$  denotes the reprojection error, defined as:

$$\mathbf{r}(n) = \lambda_i \begin{bmatrix} \mathbf{x}^n \\ 1 \end{bmatrix} - \mathbf{K} [\mathbf{R} | \mathbf{t}] \begin{bmatrix} \mathbf{z}^n \\ 1 \end{bmatrix}. \quad (20)$$

In Eq. (20),  $\lambda_i$  represents the depth value associated with the 3D point  $\mathbf{z}^n$ , used to scale the projection onto the 2D image plane accurately. In Eq. (19),  $\rho(\cdot)$  represents a robust loss function. Consistent with the methodology of Wang *et al.* [45], we employ the Huber loss as the robust estimation function, given by:

$$H(e) = \begin{cases} \frac{1}{2}e^2, & \text{if } e \leq \delta \\ \delta(|e| - \frac{1}{2}\delta), & \text{otherwise} \end{cases}. \quad (21)$$

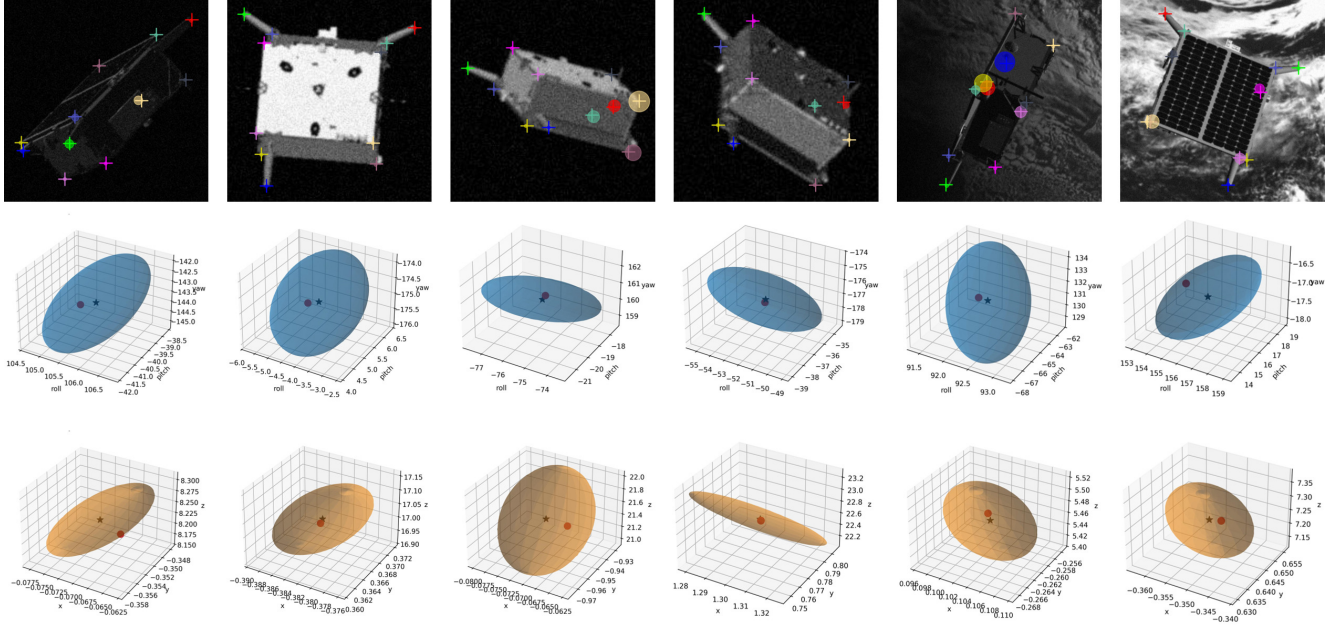

Figure 7.  $\mathcal{K}^r$ ,  $\mathcal{R}_r^d$ , and  $\mathcal{T}_r^d$  (corresponding to rows 1 to 3) for six images (corresponding to columns 1 to 6) in the SPEED dataset when  $\epsilon = 0.1$ .

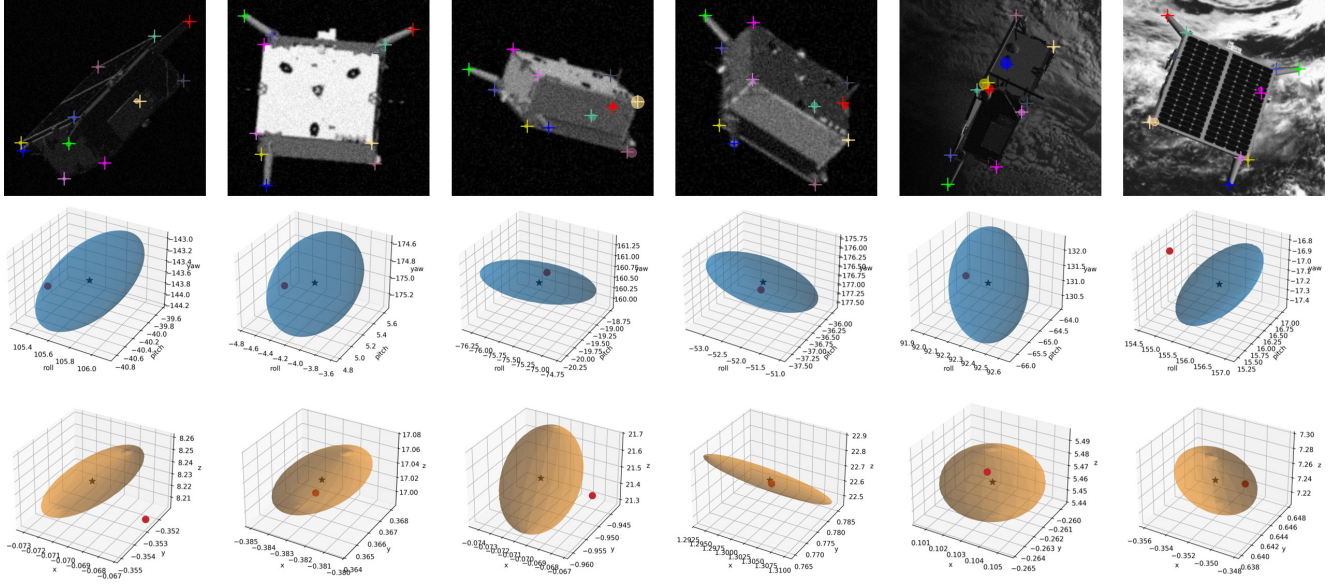

Figure 8.  $\mathcal{K}^r$ ,  $\mathcal{R}_r^d$ , and  $\mathcal{T}_r^d$  (corresponding to rows 1 to 3) for six images (corresponding to columns 1 to 6) in the SPEED dataset when  $\epsilon = 0.4$ .

Conventional PnP algorithms are prone to inaccuracies from poorly localized keypoints. By integrating uncertainty weights into our single-shot PnP approach, we enhance pose estimation accuracy and overcome the limitations of traditional methods.

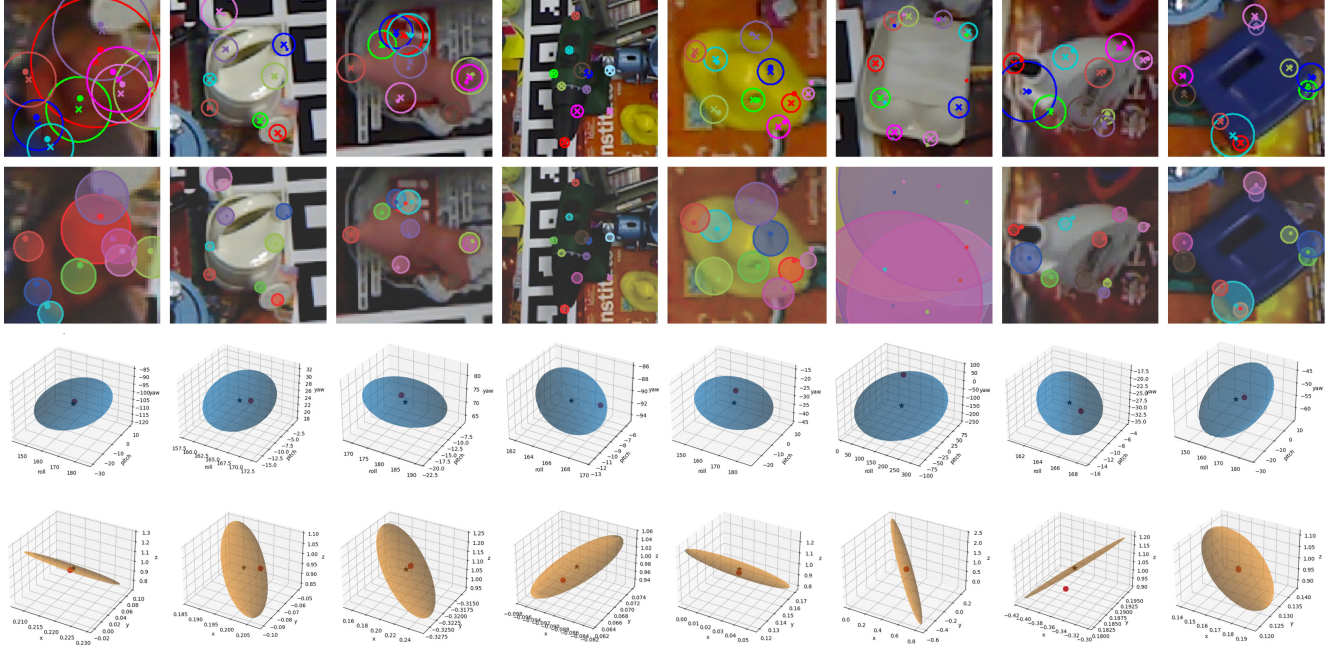

Figure 9.  $\mathcal{P}_{\Theta}(\mathbf{x}_n|\mathbf{I})$ ,  $\mathcal{K}^r$ ,  $\mathcal{R}_r^d$ , and  $\mathcal{T}_r^d$  (corresponding to rows 1 to 4) for eight objects (corresponding to columns 1 to 8) in some image of the LMO dataset when  $\epsilon = 0.1$ .

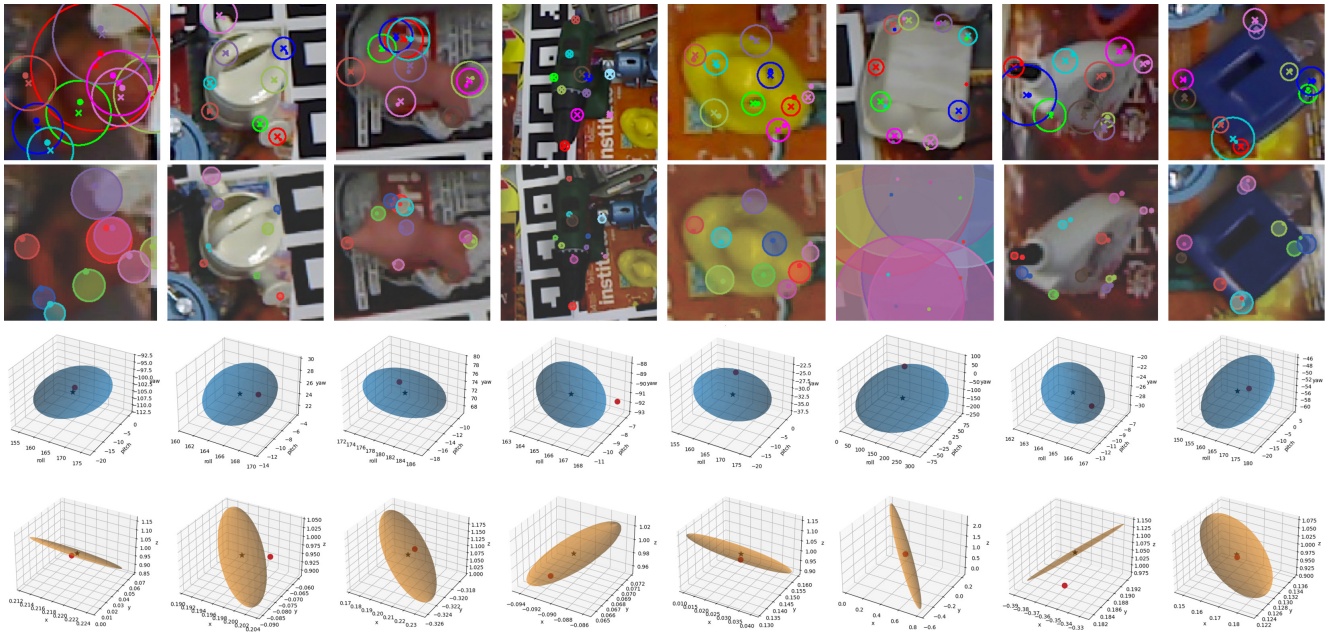

Figure 10.  $\mathcal{P}_{\Theta}(\mathbf{x}_n|\mathbf{I})$ ,  $\mathcal{K}^r$ ,  $\mathcal{R}_r^d$ , and  $\mathcal{T}_r^d$  (corresponding to rows 1 to 4) for eight objects (corresponding to columns 1 to 8) in some image of the LMO dataset when  $\epsilon = 0.4$ .
